# Supplementary material
Source: PubMed Central journal article supplement (PMC3349237)
Supplement: NIHMS355853-supplement-Supplementary_Fig1.pdf [file NIHMS355853-supplement-Supplementary_Fig1.pdf]

## Supplementary Data

# Neuronal c-Abl Overexpression Leads to Neuronal Loss and Neuroinflammation in the Mouse Forebrain

Sarah D. Schlatterer<sup>a</sup>, Matthew A. Tremblay<sup>a</sup>, Christopher M. Acker<sup>a</sup> and Peter Davies<sup>a,b,\*</sup>

<sup>a</sup>Department of Pathology, Albert Einstein College of Medicine, Bronx, NY, USA

<sup>b</sup>Litwin-Zucker Center for Research in Alzheimer's Disease and Memory Disorders, Feinstein Center for Medical Research, North Shore, Long Island Jewish Health System, Manhasset, NY, USA

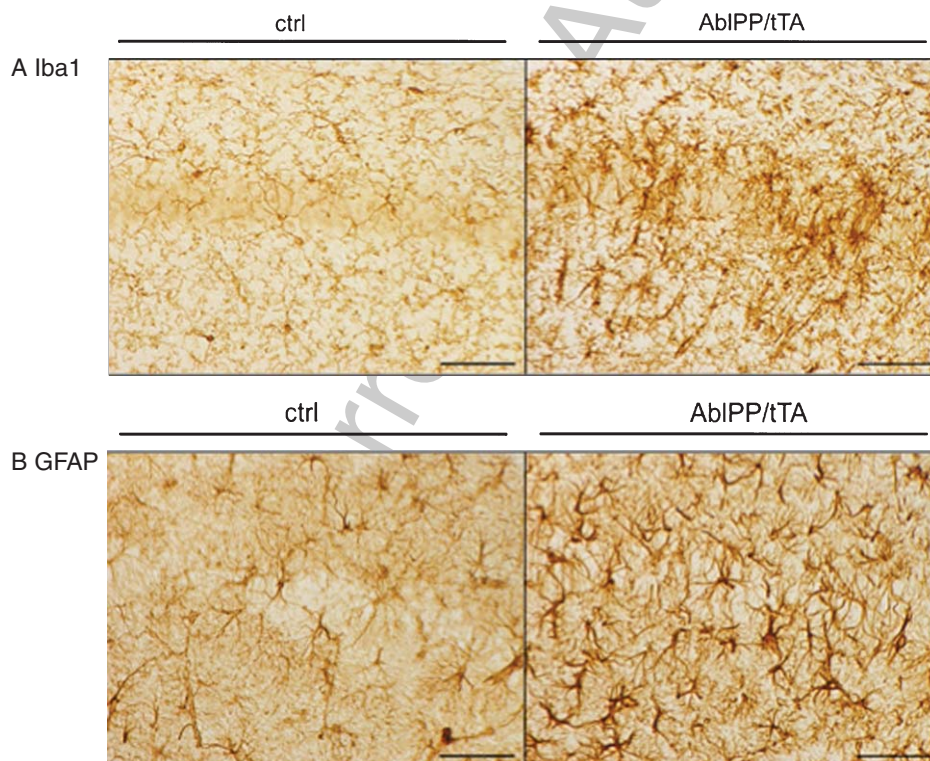

Supplementary Figure 1. A) Iba1 immunohistochemistry of CA1 of control versus AbIPP/tTA mouse 15 weeks off doxycycline. Scale bars = 400  $\mu$ m. B) GFAP immunohistochemistry of CA1 of control versus AbIPP/tTA mouse 12 weeks off doxycycline. Scale bars = 400  $\mu$ m.

\*Correspondence to: Peter Davies, Ph.D., Litwin-Zucker Center, Feinstein Institute for Medical Research, North Shore/LIJ, 350 Community Drive, Manhasset, NY 11030, USA. E-mail: pdavies@nshs.edu.
